# Supplementary material for: Terbium-doped carbon dots (Tb-CDs) as a novel contrast agent for efficient X-ray attenuation
Source: Royal Society of Chemistry journal article supplement (doi:10.1039/d3ra00958k), 2023-01-01
Supplement: d3ra00958k1.pdf [file d3ra00958k1.pdf]

## Supporting Information

### **Terbium-doped carbon dots (Tb-CDs) as a novel contrast agent for efficient X-ray attenuation**

Anara Molkenova<sup>1#</sup>, Lazzat Serik<sup>2#</sup>, Alina Ramazanova<sup>3</sup>, Kamila Zhumanova<sup>2</sup>, Bakyt Duisenbayeva<sup>4</sup>, Ainur Zhussupbekova<sup>5</sup>, Kuanysh Zhussupbekov<sup>5</sup>, Igor V. Shvets<sup>5</sup>, Ki Su Kim<sup>1,7,8</sup>, Dong-Wook Han<sup>6</sup>, Timur Sh. Atabaev<sup>2\*</sup>

<sup>1</sup>*Institute of Advanced Organic Materials, Pusan National University, Busan 46241, Republic of Korea*

<sup>2</sup>*Department of Chemistry, Nazarbayev University, Astana 010000, Kazakhstan*

<sup>3</sup>*Department of Biology, University of Padua, Padua 35121, Italy*

<sup>4</sup>*Department of Radiology, Republican Diagnostic Center, Astana 010000, Kazakhstan*

<sup>5</sup>*School of Physics and Centre for Research on Adaptive Nanostructures and Nanodevices (CRANN), Trinity College Dublin, Dublin, Ireland*

<sup>6</sup>*Department of Cogno-Mechatronics Engineering, Pusan National University, Busan 46241, Republic of Korea*

<sup>7</sup>*School of Chemical Engineering, College of Engineering, Pusan National University, 2 Busandaehak-ro 63 beon-gil, Geumjeong-gu, Busan 46241, Republic of Korea*

<sup>8</sup>*Department of Organic Material Science & Engineering, Pusan National University, 2 Busandaehak-ro 63 beon-gil, Geumjeong-gu, Busan 46241, Republic of Korea*

# - these authors contributed equally

\*Correspondence: [timur.atabaev@nu.edu.kz](mailto:timur.atabaev@nu.edu.kz) (T.S. Atabaev)

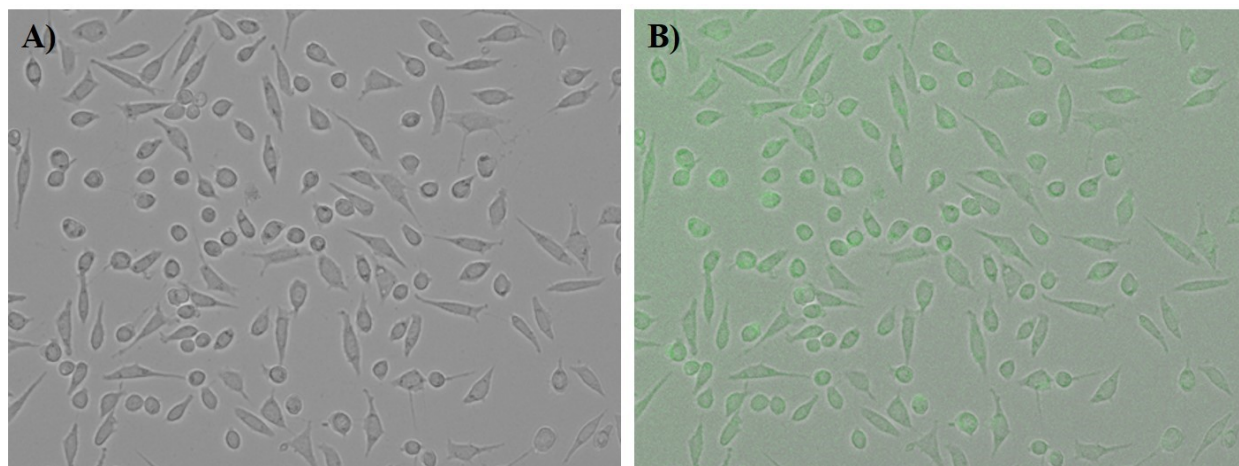

**Figure S1.** A) Phase contrast image of L929 cells incubated with Tb-CDs, and B) fluorescence image of the same region of interest

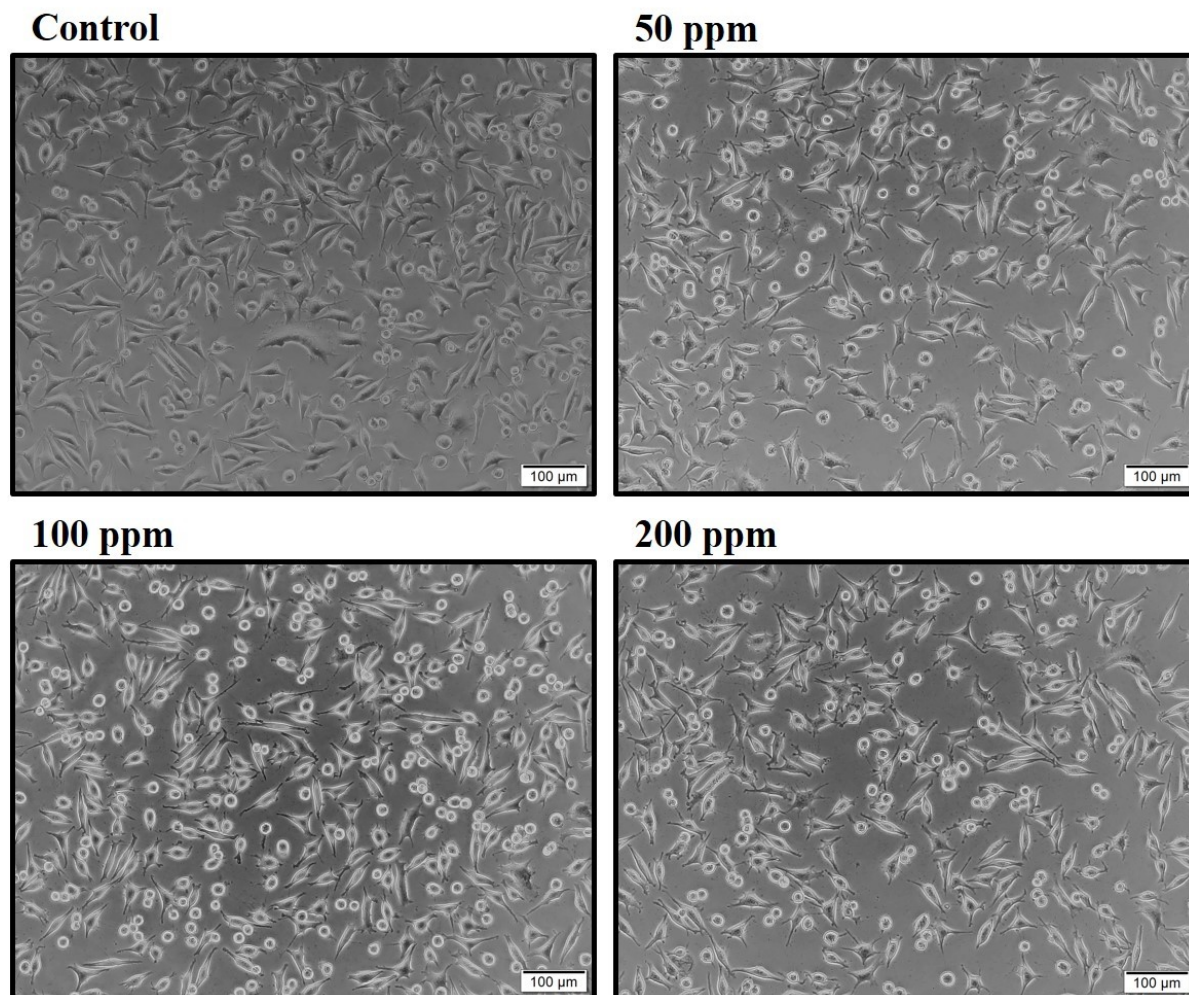

**Figure S2.** Morphological alterations of L929 cells incubated with Tb-CDs at different concentrations
